# Supplementary material for: Alterations in Plasma Lipid Profile before and after Surgical Removal of Soft Tissue Sarcoma
Source: MDPI journal article supplement (doi:10.3390/metabo14050250), 2024-04-25
Supplement: s1 [file s1]

**Supplementary data S1.** The patient information for plasma samples for soft tissue sarcoma

| Individual | Gender | Age | Subtype                                 | Location of primary tumor | Location of recurrence |
|------------|--------|-----|-----------------------------------------|---------------------------|------------------------|
| 1          | M      | 62  | Myxofibrosarcoma                        | Right forearm             | None                   |
| 2          | F      | 76  | Undifferentiated pleomorphic sarcoma    | Right thigh               | None                   |
| 3          | F      | 74  | Dedifferentiated liposarcoma            | Right thigh               | None                   |
| 4          | F      | 51  | Leiomyosarcoma                          | Right hip                 | Local                  |
| 5          | F      | 61  | Leiomyosarcoma                          | Right thigh               | Local                  |
| 6          | F      | 73  | Undifferentiated pleomorphic sarcoma    | Left hip                  | Local                  |
| 7          | M      | 42  | Undifferentiated pleomorphic sarcoma    | Right calf                | None                   |
| 8          | F      | 61  | Leiomyosarcoma                          | Left thigh                | None                   |
| 9          | M      | 64  | Leiomyosarcoma                          | Left thigh                | Lung                   |
| 10         | M      | 65  | Myxofibrosarcoma                        | Right upper arm           | Lung                   |
| 11         | M      | 65  | Myxofibrosarcoma                        | Right thigh               | Local                  |
| 12         | M      | 56  | Pleomorphic leiomyosarcoma              | Left thigh                | None                   |
| 13         | M      | 73  | Myxofibrosarcoma                        | Right thigh               | None                   |
| 14         | M      | 71  | Myxoid liposarcoma                      | Left thigh                | None                   |
| 15         | F      | 61  | Malignant peripheral nerve sheath tumor | Left shoulder             | Left thigh             |
| 16         | F      | 75  | Dedifferentiated liposarcoma            | Left calf                 | None                   |
| 17         | M      | 46  | Leiomyosarcoma                          | Right thigh               | None                   |
| 18         | F      | 49  | Well differentiated liposarcoma         | Right hip                 | None                   |
| 19         | M      | 65  | Pleomorphic liposarcoma                 | Right thigh               | None                   |
| 20         | M      | 57  | Angiosarcoma                            | Left hip                  | Local                  |
| 21         | F      | 57  | Myxofibrosarcoma                        | Left thigh                | None                   |
| 22         | M      | 60  | Dedifferentiated liposarcoma            | Retroperitoneum           | Local                  |
| 23         | F      | 42  | Myxoid liposarcoma                      | Left thigh                | Local                  |
| 24         | M      | 51  | Leiomyosarcoma                          | Left thigh                | Lung                   |

**Supplementary data S2.** The collection time of post-surgery plasma, recurrence, and chemotherapy for individual patients.

| Individual | Date of operation | Post-operative date of plasma collection | Date of recurrence | Pre- or post-operative chemotherapy | Distant metastasis |
|------------|-------------------|------------------------------------------|--------------------|-------------------------------------|--------------------|
| 1          | 10/05/2019        | 16/05/2019                               | No recurrence      | -                                   | -                  |
| 2          | 22/02/2019        | 07/03/2019                               | No recurrence      | -                                   | -                  |
| 3          | 14/08/2019        | 21/08/2019                               | No recurrence      | -                                   | -                  |
| 4          | 23/10/2019        | 10/11/2019                               | 29/05/2020         | -                                   | -                  |
| 5          | 16/09/2019        | 22/10/2019                               | 20/04/2020         | -                                   | -                  |
| 6          | 07/10/2020        | 14/10/2020                               | 31/12/2020         | -                                   | +                  |
| 7          | 11/11/2020        | 24/11/2020                               | No recurrence      | +                                   | -                  |
| 8          | 21/05/2021        | 25/06/2021                               | No recurrence      | +                                   | -                  |
| 9          | 29/09/2021        | 06/10/2021                               | 16/02/2022         | -                                   | +                  |
| 10         | 25/11/2020        | 02/12/2020                               | 09/11/2021         | -                                   | +                  |
| 11         | 04/09/2020        | 15/09/2020                               | 11/10/2021         | -                                   | -                  |
| 12         | 14/07/2021        | 23/07/2021                               | No recurrence      | +                                   | -                  |
| 13         | 16/06/2021        | 25/06/2021                               | No recurrence      | +                                   | -                  |
| 14         | 14/05/2021        | 24/05/2021                               | No recurrence      | +                                   | -                  |
| 15         | 16/01/2019        | 21/01/2019                               | 26/07/2019         | -                                   | +                  |
| 16         | 08/05/2019        | 15/05/2019                               | No recurrence      | -                                   | -                  |
| 17         | 14/08/2019        | 21/08/2019                               | No recurrence      | -                                   | -                  |
| 18         | 05/11/2018        | 12/11/2018                               | No recurrence      | -                                   | -                  |
| 19         | 30/03/2020        | 13/04/2020                               | No recurrence      | +                                   | -                  |
| 20         | 04/03/2020        | 18/03/2020                               | 06/12/2020         | -                                   | -                  |
| 21         | 12/08/2019        | 21/08/2019                               | No recurrence      | -                                   | -                  |
| 22         | 08/11/2019        | 23/12/2019                               | 20/07/2021         | -                                   | -                  |
| 23         | 26/04/2019        | 08/05/2019                               | 06/09/2019         | +                                   | -                  |
| 24         | 19/12/2018        | 26/12/2018                               | 04/01/2019         | -                                   | +                  |
